# Supplementary material
Source: publisher site journal article supplement (https://www.spandidos-publications.com/2031/downloadSupplementary)

Figure S1. S1PR1 mRNA levels after plasmid transfection. The results are presented as the mean  $\pm$  SD of at least three experimental repeats. \*\*P<0.01, negative control; S1PR1, sphingosine-1-phosphate receptor 1.

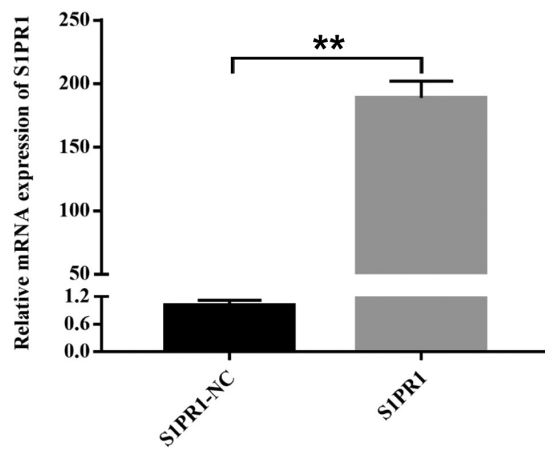

Supplement: Supplementary file 1 [file downloadSupplementary]
